# Supplementary material
Source: publisher figshare collection journal article supplement (https://acs.figshare.com/ndownloader/files/21166926)
Supplement: Supplementary file 1 [file 21166926]

Compound_ID	SMILES	OX1 pKi	OX2 pKi	IC50 or other compound property (optional)	Other compound property (optional)	Other compound property (optional)
1	COC1=C(OC)C=C([C@H](CCC2=CC=C(C(F)(F)F)C=C2)N([C@@H](C(NC)=O)C3=CC=CC=C3)CC4)C4=C1	-	-
2	O=C(C1=CC(C)=CC=C1N2N=CC=N2)N3CCN(C4=NC(C=C(Cl)C=C5)=C5O4)CC[C@H]3C	9.4	9.1
3	O=C(N6C[C@H](COC7=NC=C(F)C=C7)CC[C@H]6C)C8=C(C9=NC=CC=N9)C=CC(C)=C8	9.2	9.7
4	CC1=NC(C)=C(C=N1)OC[C@]2(C3=CC(F)=CC=C3)[C@H](C(N(C4=CC=C(F)C=N4)[H])=O)C2	8.6	9.3
5	O=C(C5=CC(OC)=CC=C5N6N=CC=N6)N7[C@@](C8=NC9=C(C(C)=C(Cl)C=C9)N8)(C)CCC7	8.8	8.9
6	O=C(NCC%10=CC=C(OC)C(OC)=N%10)C%11=CC(C%12=CC(Cl)=CN=C%12)=CN=C%11C%13=CC=CC=N%13	-	-
7	CC1=NC(N2CC3CN(C(C4=C(F)C=CC=C4N5N=CC=N5)=O)CC3C2)=NC(C)=C1	-	-
8	O=S(C6=CC=CC=C6C)(N(CC(N(CC)CC7=CC=CN=C7)=O)C8=CC=C(OC)N=C8)=O	8.9	6
9	FC9=CC=CC=C9C%10=C(C(N%11[C@H](CC%12=NN=C(C%13=CC=CC=C%13)O%12)CCC%11)=O)N=C(C)S%10	-	-
10	O=C(C1=CC=CC(F)=C1OC)N2[C@H](CNC3=CC=C(Br)C=N3)CC[C@H](C)C2	9	7.2
11	O=C(NC4=CC=C(N=C(C)O5)C5=C4)NC6=CC=NC7=CC=CN=C76	7.8	6.2
12	FC8=CC(F)=C(N=C(C)C=C9NC(NC%10=CC=C(N(C)C)C=C%10)=O)C9=C8	7.6	6.1
13	O=C5N(CC6=C(F)C=C(F)C=C6F)C7=NC=CC=C7S(N5C8=CN=C(OC)C(OC)=C8)(=O)=O	7.5	8.3
14	O=C1N(CC2=C(F)C=C(F)C=C2F)C3=NC=CC=C3S(N1C4=CN=CC(S(C)(=O)=O)=C4)(=O)=O	7.8	7.3
15	O=S(N9CCC[C@H]9C(NC%10=CC(C)=CC(C)=C%10)=O)(C%11=CC=C(OC)C=C%11)=O	8.2	9.2
16	O=S(N%12C%13(CCC%12)CCN(C%14=NC%15=C(C=CC=C%15)O%14)CC%13)(C%16=CC=CC=C%16)=O	7.1	7.8
